# Supplementary material for: RC4USCoast: A river chemistry dataset for regional ocean model applications in the U.S. East, Gulf of Mexico, and West Coasts
Source: Copernicus journal article supplement (doi:10.5194/essd-2022-341), 2022-10-28
Supplement: Supplementary file 1 [file essd-2022-341-supplement.pdf]

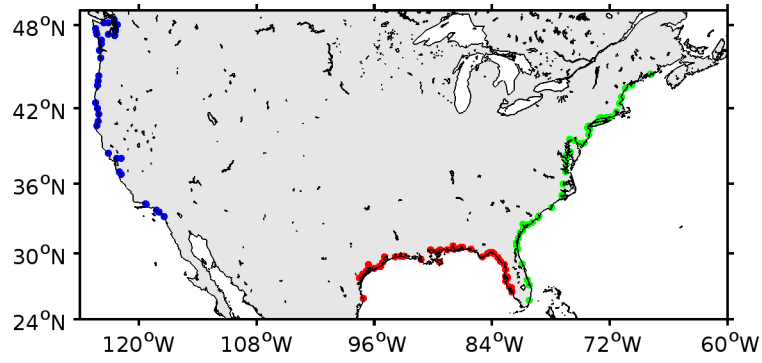

**Figure S1.** River mouth locations assigned to the USGS sites in the RC4USCoast database. Green, red, and blue dots correspond to river discharging to the East, Gulf of Mexico, and West Coast, respectively.

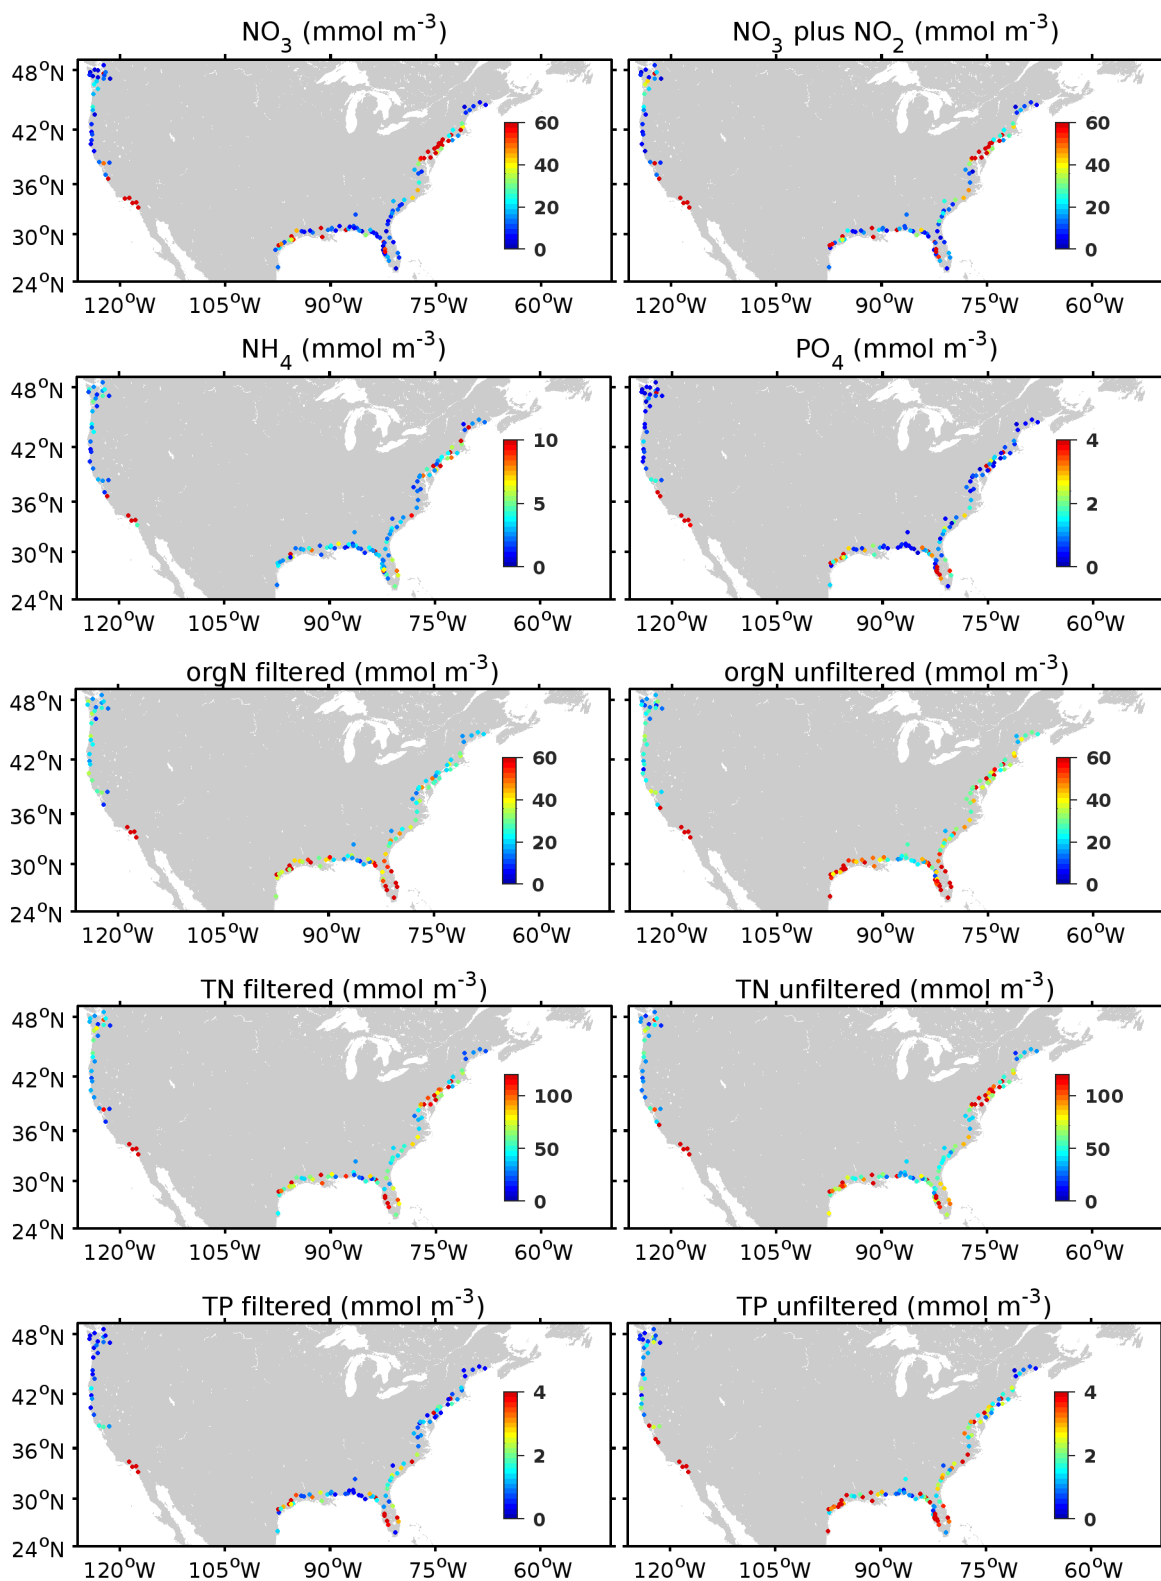

**Figure S2.** Mean patterns for nutrients concentration and other river's variables: nitrate ( $\text{NO}_3$ , filtered), nitrate plus nitrite ( $\text{NO}_3$  plus  $\text{NO}_2$ , filtered), ammonia ( $\text{NH}_4$ , filtered), phosphate ( $\text{PO}_4$ , filtered), organic nitrogen (orgN, filtered and unfiltered), total nitrogen (TN, filtered and unfiltered), and total phosphorous (TP, filtered and unfiltered).

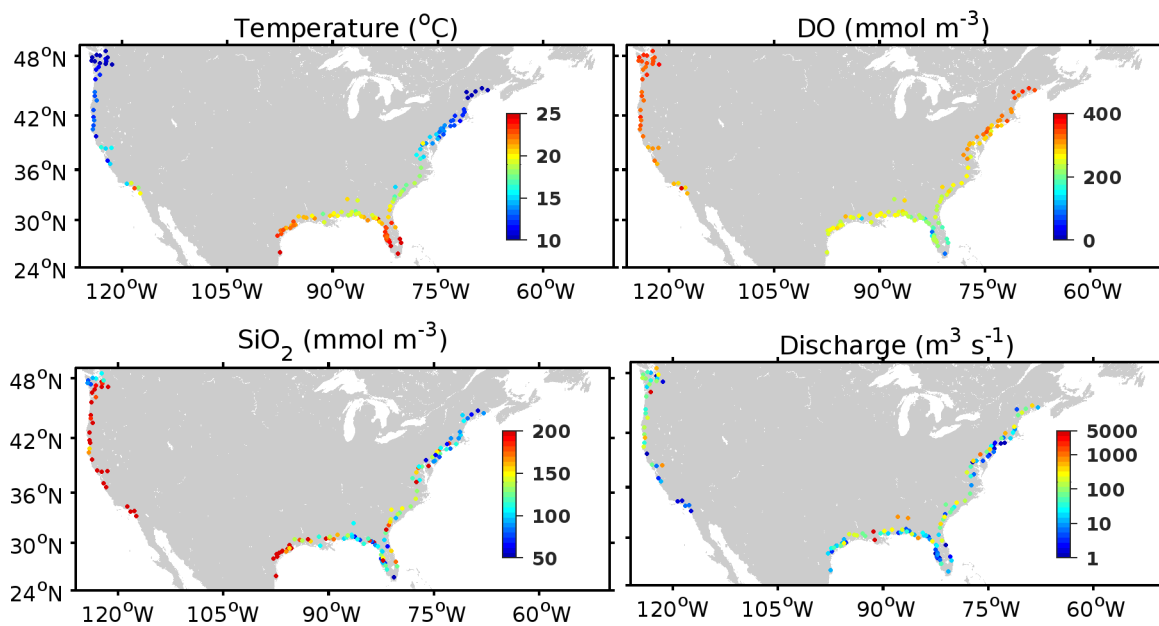

**Figure S2 (continued).** Water temperature, dissolved oxygen (DO), silica (SiO<sub>2</sub>), and discharge. Colorbar for discharge is in log scale.

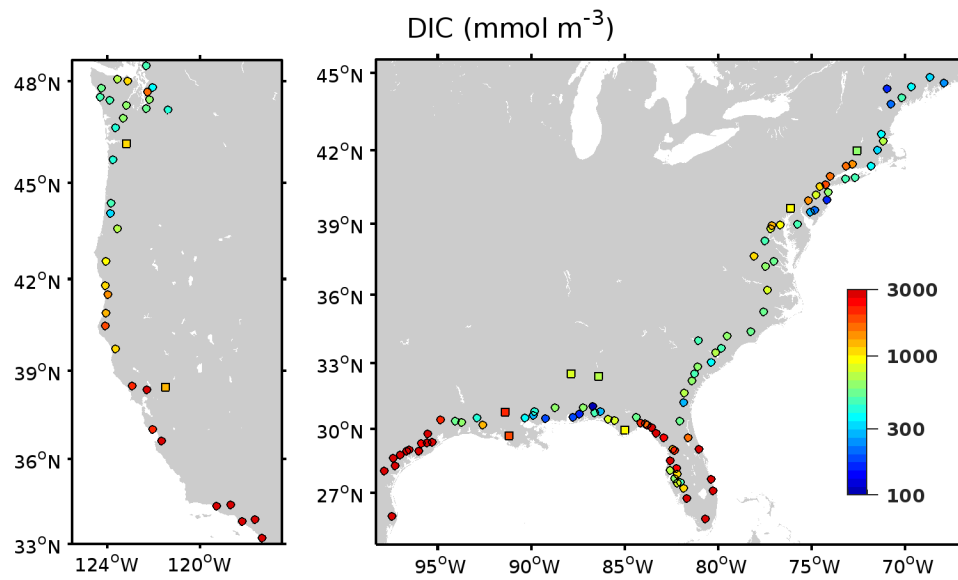

**Figure S3.** Long-term mean (colored dots and squares) of river DIC. Squares (dots) represent river stations with a mean discharge greater (smaller) than  $500 \text{ m}^3 \text{ s}^{-1}$ . Colorbar is in logscale.

**Table S1.** Selected USGS station for the river chemistry dataset. Coordinates for the USGS stations and approximate location for the river mouths are reported.

| ID | River name       | USGS ID | Station latitude | Station longitude | Mouth latitude | Mouth longitude | Observation         |
|----|------------------|---------|------------------|-------------------|----------------|-----------------|---------------------|
| 1  | Narraguagus      | 1022500 | 44.61            | -67.94            | 44.52          | -67.86          |                     |
| 2  | Penobscot        | 1036390 | 44.83            | -68.70            | 44.50          | -67.79          |                     |
| 3  | Kennebec         | 1049265 | 44.47            | -69.68            | 43.75          | -69.77          |                     |
| 4  | Wild river       | 1054200 | 44.39            | -70.98            | 43.75          | -69.77          | flows to Kennebec   |
| 5  | Androscoggin     | 1059000 | 44.07            | -70.21            | 43.75          | -69.77          | flows to Kennebec   |
| 6  | Saco             | 1066000 | 43.81            | -70.78            | 43.46          | -70.38          |                     |
| 7  | Merrimack        | 1100000 | 42.65            | -71.30            | 42.81          | -70.81          |                     |
| 8  | Charles          | 1104615 | 42.36            | -71.19            | 42.34          | -71.01          |                     |
| 9  | Blackstone       | 1112500 | 42.01            | -71.50            | 41.72          | -71.34          | flows to Providence |
| 10 | Pawcatuck        | 1118500 | 41.38            | -71.83            | 41.32          | -71.85          |                     |
| 11 | Connecticut      | 1184000 | 41.99            | -72.61            | 41.29          | -72.35          |                     |
| 12 | Quinnipiac       | 1196500 | 41.45            | -72.84            | 41.30          | -72.88          |                     |
| 13 | Housatonic       | 1205500 | 41.38            | -73.17            | 41.17          | -73.11          |                     |
| 14 | Nissequogue      | 1304000 | 40.85            | -73.22            | 40.91          | -73.23          |                     |
| 15 | Peconic          | 1304500 | 40.91            | -72.69            | 41.11          | -72.31          |                     |
| 16 | Hackensack       | 1378500 | 40.95            | -74.03            | 40.65          | -74.09          |                     |
| 17 | Rahway           | 1395000 | 40.62            | -74.28            | 40.59          | -74.21          |                     |
| 18 | Raritan          | 1400500 | 40.56            | -74.58            | 40.49          | -74.28          |                     |
| 19 | Swimming         | 1407500 | 40.32            | -74.12            | 40.36          | -74.07          | flows to Navesink   |
| 20 | Toms             | 1408500 | 39.99            | -74.22            | 39.93          | -74.11          |                     |
| 21 | Great Egg Harbor | 1411000 | 39.59            | -74.85            | 39.29          | -74.60          |                     |
| 22 | Maurice          | 1411500 | 39.50            | -75.08            | 39.21          | -75.03          |                     |
| 23 | Delaware         | 1463500 | 40.22            | -74.78            | 39.47          | -75.56          |                     |
| 24 | Schuylkill       | 1474500 | 39.97            | -75.19            | 39.47          | -75.56          | flows to Delaware   |
| 25 | Choptank         | 1491000 | 39.00            | -75.79            | 38.57          | -76.02          |                     |
| 26 | Susquehanna      | 1578310 | 39.66            | -76.17            | 39.57          | -76.09          |                     |
| 27 | Patuxent         | 1594440 | 38.96            | -76.69            | 38.31          | -76.41          |                     |
| 28 | Potomac          | 1646500 | 38.95            | -77.13            | 38.05          | -76.43          |                     |
| 29 | Accotink creek   | 1654000 | 38.81            | -77.23            | 38.05          | -76.43          | flows to Potomac    |
| 30 | Rappahannock     | 1668000 | 38.31            | -77.53            | 37.60          | -76.39          |                     |

Table S1 (continued)

| <b>ID</b> | <b>River name</b> | <b>USGS ID</b> | <b>Station Latitude</b> | <b>Station Longitude</b> | <b>Mouth Latitude</b> | <b>Mouth Longitude</b> | <b>Observations</b> |
|-----------|-------------------|----------------|-------------------------|--------------------------|-----------------------|------------------------|---------------------|
| 31        | James             | 2035000        | 37.67                   | -78.09                   | 36.99                 | -76.51                 |                     |
| 32        | Appomattox        | 2041650        | 37.23                   | -77.48                   | 36.99                 | -76.51                 | flows to James      |
| 33        | Chickahominy      | 2042500        | 37.44                   | -77.06                   | 36.99                 | -76.51                 | flows to James      |
| 34        | Roanoke           | 2081000        | 36.21                   | -77.38                   | 35.95                 | -76.72                 |                     |
| 35        | Neuse             | 2089500        | 35.26                   | -77.59                   | 34.98                 | -76.90                 |                     |
| 36        | Cape Fear         | 2105769        | 34.40                   | -78.29                   | 33.97                 | -77.94                 |                     |
| 37        | Pee Dee           | 2131000        | 34.20                   | -79.55                   | 33.27                 | -79.21                 |                     |
| 38        | Black             | 2136000        | 33.66                   | -79.84                   | 33.27                 | -79.21                 | flows to Pee Dee    |
| 39        | Saluda            | 2169000        | 34.01                   | -81.09                   | 32.74                 | -79.86                 | flows to Congaree   |
| 40        | Santee            | 2171500        | 33.45                   | -80.14                   | 33.11                 | -79.28                 |                     |
| 41        | Edisto            | 2175000        | 33.03                   | -80.39                   | 32.50                 | -80.35                 |                     |
| 42        | Coosawhatchie     | 2176500        | 32.84                   | -81.13                   | 32.53                 | -80.85                 |                     |
| 43        | Savannah          | 2198500        | 32.53                   | -81.27                   | 32.05                 | -80.87                 |                     |
| 44        | Ogeechee          | 2202500        | 32.19                   | -81.42                   | 31.85                 | -81.09                 |                     |
| 45        | Altamaha          | 2226000        | 31.65                   | -81.83                   | 31.32                 | -81.31                 |                     |
| 46        | Satilla           | 2228000        | 31.22                   | -81.87                   | 30.97                 | -81.48                 |                     |
| 47        | St Marys          | 2231000        | 30.36                   | -82.08                   | 30.72                 | -81.49                 |                     |
| 48        | St Johns          | 2244450        | 29.60                   | -81.61                   | 30.40                 | -81.40                 |                     |
| 49        | Spruce creek      | 2248000        | 29.05                   | -81.05                   | 29.09                 | -80.95                 |                     |
| 50        | Main canal        | 2253000        | 27.65                   | -80.41                   | 27.65                 | -80.37                 |                     |
| 51        | St Lucie          | 2277000        | 27.11                   | -80.28                   | 27.17                 | -80.18                 |                     |
| 52        | Tamiami           | 2288900        | 25.85                   | -80.98                   | 25.77                 | -80.19                 | flows to Miami      |
| 53        | Caloosahatchee    | 2292900        | 26.72                   | -81.69                   | 26.53                 | -81.99                 |                     |
| 54        | Peace             | 2296750        | 27.22                   | -81.88                   | 26.95                 | -82.04                 |                     |
| 55        | Myakka            | 2297155        | 27.49                   | -82.02                   | 27.00                 | -82.25                 |                     |
| 56        | Manatee           | 2299950        | 27.47                   | -82.21                   | 27.52                 | -82.63                 |                     |
| 57        | Little Manatee    | 2300500        | 27.67                   | -82.35                   | 27.71                 | -82.47                 |                     |
| 58        | Alafia            | 2301500        | 27.87                   | -82.21                   | 27.85                 | -82.40                 |                     |
| 59        | Hillsborough      | 2303000        | 28.15                   | -82.23                   | 27.94                 | -82.46                 |                     |
| 60        | Rocky creek       | 2306774        | 28.07                   | -82.57                   | 27.98                 | -82.60                 |                     |

Table S1 (continued)

| <b>ID</b> | <b>River name</b> | <b>USGS ID</b> | <b>Station latitude</b> | <b>Station longitude</b> | <b>Mouth latitude</b> | <b>Mouth longitude</b> | <b>Observations</b>            |
|-----------|-------------------|----------------|-------------------------|--------------------------|-----------------------|------------------------|--------------------------------|
| 61        | Weeki Washee      | 2310500        | 28.52                   | -82.57                   | 28.53                 | -82.65                 |                                |
| 62        | Withlacoochee     | 2313000        | 28.99                   | -82.35                   | 29.00                 | -82.76                 |                                |
| 63        | Rainbow           | 2313100        | 29.05                   | -82.45                   | 29.00                 | -82.76                 | flows to<br>Withlacoochee      |
| 64        | Suwannee          | 2323500        | 29.59                   | -82.94                   | 29.30                 | -83.16                 |                                |
| 65        | Steinhatchee      | 2324000        | 29.79                   | -83.32                   | 29.66                 | -83.41                 |                                |
| 66        | Fenholloway       | 2324500        | 30.07                   | -83.56                   | 29.98                 | -83.78                 |                                |
| 67        | Econfina          | 2326000        | 30.17                   | -83.82                   | 30.04                 | -83.92                 |                                |
| 68        | Aucilla           | 2326512        | 30.23                   | -83.92                   | 30.09                 | -83.99                 |                                |
| 69        | St Marks          | 2326900        | 30.27                   | -84.15                   | 30.09                 | -84.19                 |                                |
| 70        | Ochlockonee       | 2329000        | 30.55                   | -84.38                   | 29.97                 | -84.42                 |                                |
| 71        | Apalachicola      | 2359170        | 29.95                   | -85.02                   | 29.71                 | -84.97                 |                                |
| 72        | Econfina          | 2359500        | 30.38                   | -85.56                   | 30.04                 | -83.93                 |                                |
| 73        | Choctawhatchee    | 2366500        | 30.45                   | -85.90                   | 30.39                 | -86.13                 |                                |
| 74        | Yellow            | 2368000        | 30.75                   | -86.63                   | 29.00                 | -82.76                 | flows to Blackwater            |
| 75        | Shoal             | 2368500        | 30.80                   | -86.31                   | 29.00                 | -82.76                 | flows to Yellow                |
| 76        | Blackwater        | 2369800        | 31.03                   | -86.71                   | 29.00                 | -82.76                 |                                |
| 77        | Escambia          | 2375500        | 30.97                   | -87.23                   | 30.54                 | -87.17                 |                                |
| 78        | Perdido           | 2376500        | 30.69                   | -87.44                   | 30.44                 | -87.36                 |                                |
| 79        | Fishriver         | 2378500        | 30.55                   | -87.80                   | 30.37                 | -87.84                 |                                |
| 80        | Alabama           | 2420000        | 32.41                   | -86.41                   | 30.68                 | -87.98                 | flows to Mobile                |
| 81        | Tombigbee         | 2467000        | 32.52                   | -87.88                   | 30.68                 | -87.98                 | flows to Mobile                |
| 82        | Pascagoula        | 2479000        | 30.98                   | -88.73                   | 30.35                 | -88.57                 |                                |
| 83        | Wolf              | 2481510        | 30.48                   | -89.27                   | 30.35                 | -89.29                 |                                |
| 84        | Pearl             | 2489500        | 30.79                   | -89.82                   | 30.18                 | -89.52                 |                                |
| 85        | Bogue Chito       | 2492000        | 30.63                   | -89.90                   | 30.18                 | -89.61                 | flows to Old Pearl             |
| 86        | Mississippi       | 7373420        | 30.76                   | -91.40                   | 29.27                 | -89.33                 |                                |
| 87        | Tangipahoa        | 7375500        | 30.51                   | -90.36                   | 30.34                 | -90.28                 | flows to Lake<br>Pontchartrain |
| 88        | Atchafalaya       | 7381600        | 29.69                   | -91.21                   | 29.47                 | -91.27                 |                                |
| 89        | Mermentau         | 8012150        | 30.19                   | -92.59                   | 29.73                 | -93.01                 |                                |
| 90        | Calcasieu         | 8015500        | 30.50                   | -92.92                   | 29.76                 | -93.34                 |                                |

Table S1 (continued)

| <b>ID</b> | <b>River name</b> | <b>USGS ID</b> | <b>Station latitude</b> | <b>Station longitude</b> | <b>Mouth latitude</b> | <b>Mouth longitude</b> | <b>Observations</b>  |
|-----------|-------------------|----------------|-------------------------|--------------------------|-----------------------|------------------------|----------------------|
| 91        | Sabine            | 8030500        | 30.30                   | -93.74                   | 29.68                 | -93.83                 | flows to Sabine Lake |
| 92        | Neches            | 8041000        | 30.36                   | -94.09                   | 29.68                 | -93.83                 | flows to Sabine Lake |
| 93        | Trinity           | 8066500        | 30.43                   | -94.85                   | 29.68                 | -94.96                 |                      |
| 94        | Buffalo bayou     | 8073600        | 29.76                   | -95.56                   | 29.68                 | -94.96                 |                      |
| 95        | Chocolate bayou   | 8078000        | 29.37                   | -95.32                   | 29.20                 | -95.18                 |                      |
| 96        | Brazos            | 8116650        | 29.35                   | -95.58                   | 28.87                 | -95.37                 |                      |
| 97        | San Bernard       | 8117500        | 29.31                   | -95.89                   | 28.84                 | -95.47                 |                      |
| 98        | Colorado          | 8162500        | 28.97                   | -96.01                   | 28.65                 | -95.98                 |                      |
| 99        | Lavaca            | 8164000        | 28.96                   | -96.69                   | 28.67                 | -96.58                 |                      |
| 100       | Navidad           | 8164500        | 29.03                   | -96.55                   | 29.02                 | -96.56                 |                      |
| 101       | Guadalupe         | 8176500        | 28.79                   | -97.01                   | 28.44                 | -96.78                 |                      |
| 102       | San Antonio       | 8188500        | 28.65                   | -97.38                   | 28.44                 | -96.78                 | flows to Guadalupe   |
| 103       | Mission           | 8189500        | 28.29                   | -97.28                   | 28.15                 | -97.15                 |                      |
| 104       | Nueces            | 8211000        | 28.04                   | -97.86                   | 27.83                 | -97.49                 |                      |
| 105       | Rio Grande        | 8475000        | 25.88                   | -97.45                   | 25.95                 | -97.14                 |                      |
| 106       | San Luis Rey      | 11042000       | 33.22                   | -117.36                  | 33.20                 | -117.39                |                      |
| 107       | Santa Ana         | 11074000       | 33.88                   | -117.65                  | 33.62                 | -117.96                |                      |
| 108       | Los Angeles       | 11103000       | 33.82                   | -118.21                  | 33.76                 | -118.20                |                      |
| 109       | Santa Clara       | 11108500       | 34.40                   | -118.71                  | 34.23                 | -119.26                |                      |
| 110       | Ventura           | 11118500       | 34.35                   | -119.31                  | 34.28                 | -119.31                |                      |
| 111       | Salinas           | 11152500       | 36.63                   | -121.67                  | 36.75                 | -121.80                |                      |
| 112       | San Lorenzo       | 11160500       | 37.04                   | -122.07                  | 36.96                 | -122.01                |                      |
| 113       | Sacramento        | 11447650       | 38.46                   | -121.50                  | 38.06                 | -121.80                |                      |
| 114       | Napa              | 11458000       | 38.37                   | -122.30                  | 38.08                 | -122.24                |                      |
| 115       | Russian           | 11467000       | 38.51                   | -122.93                  | 38.45                 | -123.13                |                      |
| 116       | Elder             | 11475560       | 39.73                   | -123.64                  | 38.06                 | -121.80                | flows to Sacramento  |
| 117       | Eel               | 11477000       | 40.49                   | -124.10                  | 40.65                 | -124.31                |                      |
| 118       | Mad               | 11481000       | 40.91                   | -124.06                  | 40.97                 | -124.12                |                      |
| 119       | Klamath           | 11530500       | 41.51                   | -123.98                  | 41.54                 | -124.07                |                      |
| 120       | Smith             | 11532500       | 41.79                   | -124.08                  | 41.95                 | -124.20                |                      |



Table S1 (continued)

| <b>ID</b> | <b>River name</b> | <b>USGS ID</b> | <b>Station latitude</b> | <b>Station longitude</b> | <b>Mouth latitude</b> | <b>Mouth longitude</b> | <b>Observations</b>      |
|-----------|-------------------|----------------|-------------------------|--------------------------|-----------------------|------------------------|--------------------------|
| 121       | Willapa           | 12013500       | 46.65                   | -123.65                  | 46.70                 | -123.83                |                          |
| 122       | Chehalis          | 12031000       | 46.94                   | -123.31                  | 46.97                 | -123.80                |                          |
| 123       | Quinault          | 12039500       | 47.46                   | -123.89                  | 47.34                 | -124.30                |                          |
| 124       | Queets            | 12040500       | 47.54                   | -124.32                  | 47.55                 | -124.35                |                          |
| 125       | Hoh               | 12041200       | 47.81                   | -124.25                  | 47.75                 | -124.44                |                          |
| 126       | Elwha             | 12045500       | 48.06                   | -123.58                  | 48.15                 | -123.57                |                          |
| 127       | Dungeness         | 12048000       | 48.01                   | -123.13                  | 48.15                 | -123.13                |                          |
| 128       | Skokomish         | 12061500       | 47.31                   | -123.18                  | 47.34                 | -123.12                |                          |
| 129       | Puyayup           | 12101500       | 47.21                   | -122.33                  | 47.27                 | -122.43                |                          |
| 130       | Green             | 12103380       | 47.18                   | -121.39                  | 47.58                 | -122.36                | flows to Duwamish        |
| 131       | Cedar             | 12119000       | 47.48                   | -122.20                  | 47.67                 | -122.41                | flows to Lake Washington |
| 132       | Thorton           | 12128000       | 47.70                   | -122.28                  | 47.67                 | -122.41                | flows to Lake Washington |
| 133       | Snohomish         | 12150800       | 47.83                   | -122.05                  | 48.02                 | -122.21                |                          |
| 134       | Skagit            | 12200500       | 48.45                   | -122.34                  | 48.37                 | -122.50                |                          |
| 135       | Columbia          | 14246900       | 46.18                   | -123.18                  | 46.24                 | -124.02                |                          |
| 136       | Nehalem           | 14301000       | 45.70                   | -123.76                  | 45.69                 | -123.90                |                          |
| 137       | Alsea             | 14306500       | 44.39                   | -123.83                  | 44.42                 | -124.08                |                          |
| 138       | Siuslaw           | 14307620       | 44.06                   | -123.88                  | 44.02                 | -124.14                |                          |
| 139       | Umpqua            | 14321000       | 43.59                   | -123.56                  | 43.67                 | -124.21                |                          |
| 140       | Rogue             | 14372300       | 42.58                   | -124.06                  | 42.42                 | -124.43                |                          |

Table S2. Parameters for the linear regression of DIC vs alkalinity, and logarithm of discharge (logDisc) vs. alkalinity for the 12 rivers with the largest number of monthly records in the database.

| River       | DIC vs. alkalinity                   |                                    |                |     | Alkalinity vs. logDisc              |                                                                                    |                |     |
|-------------|--------------------------------------|------------------------------------|----------------|-----|-------------------------------------|------------------------------------------------------------------------------------|----------------|-----|
|             | Intercept<br>[mmol m <sup>-3</sup> ] | Slope [mmol<br>meq <sup>-1</sup> ] | R <sup>2</sup> | N   | Intercept<br>[meq m <sup>-3</sup> ] | Slope [meq m <sup>-3</sup><br>log(m <sup>3</sup> s <sup>-2</sup> ) <sup>-1</sup> ] | R <sup>2</sup> | N   |
| Connecticut | 90.2                                 | 0.983                              | 0.76           | 527 | 1,334.4                             | -317.7                                                                             | 0.49           | 544 |
| Delaware    | 112.8                                | 0.917                              | 0.93           | 499 | 2,002.2                             | -510.1                                                                             | 0.44           | 639 |
| Schuykill   | 131.8                                | 0.986                              | 0.93           | 241 | 2,082.4                             | -533.3                                                                             | 0.35           | 450 |
| Choptank    | 89.8                                 | 1.101                              | 0.70           | 367 | 454.2                               | -251.6                                                                             | 0.42           | 308 |
| Susquehanna | 39.1                                 | 1.013                              | 0.98           | 405 | 2,454.2                             | -527.1                                                                             | 0.50           | 407 |
| Neuse       | 157.0                                | 0.962                              | 0.56           | 421 | 924.5                               | -288.8                                                                             | 0.51           | 347 |
| Mississippi | 180.0                                | 0.965                              | 0.94           | 544 | 6,124.1                             | -976.3                                                                             | 0.36           | 711 |
| Atchafalaya | 145.1                                | 0.974                              | 0.97           | 395 | 6,904.6                             | -1,324.7                                                                           | 0.43           | 426 |
| Santa Ana   | 50.1                                 | 1.016                              | 0.99           | 493 | 5,372.2                             | -1,628.2                                                                           | 0.39           | 490 |
| Sacramento  | 75.2                                 | 0.984                              | 0.96           | 350 | 2,664.3                             | -545.4                                                                             | 0.34           | 402 |
| Eel         | 79.5                                 | 0.976                              | 0.99           | 264 | 2,986.3                             | -619.8                                                                             | 0.69           | 369 |
| Klamath     | 81.3                                 | 0.968                              | 0.98           | 250 | 2,595.4                             | -477.5                                                                             | 0.55           | 288 |
